# Supplementary material for: Layered birnessite-type MnO2 with surface pits for enhanced catalytic formaldehyde oxidation activity
Source: Royal Society of Chemistry journal article supplement (doi:10.1039/c6ta09793f), 2017-01-01
Supplement: c6ta09793f1.pdf [file c6ta09793f1.pdf]

## Supporting Information

### **Layered birnessite-type MnO<sub>2</sub> with surface pits for the enhanced formaldehyde catalytic oxidation activity**

Jinlong Wang,<sup>a,b</sup> Gaoke Zhang\*<sup>a</sup> and Pengyi Zhang\*<sup>b</sup>

<sup>a</sup> *School of Resources and Environmental Engineering, Wuhan University of Technology, Wuhan 430070, China.*

<sup>b</sup> *State Key Joint Laboratory of Environment Simulation and Pollution Control, School of Environment, Tsinghua University, Beijing 100084, China. \*Email - zpy@tsinghua.edu.cn*

<sup>c</sup> *Beijing Key Laboratory for Indoor Air Quality Evaluation and Control, Beijing 100084, China*

Table S1. Survey of catalytic performance of manganese oxides in HCHO oxidation.

| Catalyst                             | Reaction conditions                          | T <sub>100%</sub> °C | Ref.      |
|--------------------------------------|----------------------------------------------|----------------------|-----------|
| Hollow MnO <sub>2</sub> nanosphere   | 100 ppm HCHO,<br>GHSV~50000 h <sup>-1</sup>  | 80                   | [10]      |
| Pyrolusite                           |                                              | 180                  |           |
| Cryptomelane                         | 400 ppm HCHO,<br>GHSV~18000 mL/g h           | 140                  | [30]      |
| Todorokite                           |                                              | 170                  |           |
| MnO <sub>2</sub> /Cellulose Fibers   | 100 ppm HCHO, GHSV~<br>50000 h <sup>-1</sup> | 140                  | [11]      |
| Porous MnO <sub>2</sub>              | 460 ppm HCHO,<br>GHSV~30000 mL/g h           | 100                  | [31]      |
| β-MnO <sub>2</sub> /SiO <sub>2</sub> | 120 ppm HCHO,<br>GHSV~30000 mL/g h           | 130                  | [32]      |
| α-MnO <sub>2</sub>                   |                                              | 125                  |           |
| β-MnO <sub>2</sub>                   | 170 ppm HCHO,<br>GHSV~100000 mL/g h          | 200                  | [13]      |
| γ-MnO <sub>2</sub>                   |                                              | 150                  |           |
| δ-MnO <sub>2</sub>                   |                                              | 80                   |           |
| 3D-β-MnO <sub>2</sub>                | 400 ppm HCHO,<br>GHSV~30000 mL/g h           | 130                  | [33]      |
| MnO <sub>2</sub> -Graphene           | 100 ppm HCHO,<br>GHSV~30000 mL/g h           | 65                   | [15]      |
| MnO <sub>2</sub> with Mn vacancy     | 40 ppm HCHO,<br>GHSV~120000 mL/g h           | 110                  | [18]      |
| MnO <sub>2</sub> with surface pits   | 200 ppm HCHO,<br>GHSV~120000 mL/g h          | 100                  | This work |

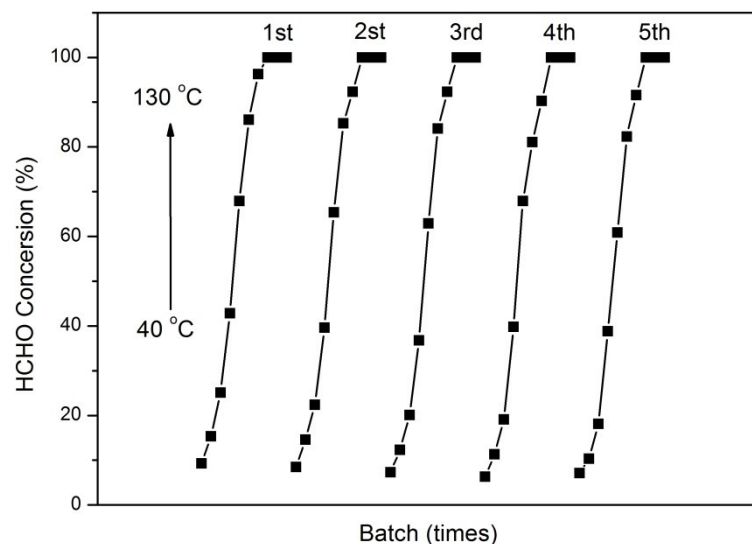

Fig. S1 The reusability of MnO<sub>2</sub>-P2 catalyst for oxidation of HCHO. Reaction conditions: 200 ppm HCHO; GHSV 120000 h<sup>-1</sup>.
